# Supplementary material
Source: HighWire-hosted journal article supplement (https://qdcxjkg.com/highwire/filestream/114274/field_highwire_adjunct_files/1/Supplementary_tables.pdf)
Supplement: Supplementary_tables.pdf [file Supplementary_tables.pdf]

## Supplementary data

**TABLE 1.** Overall patient disposition (ITT population)

|                                                                 | <b>Placebo<br/>n=68</b> | <b>UMEC<br/>62.5 mcg<br/>n=69</b> | <b>UMEC<br/>125 mcg<br/>n=69</b> |
|-----------------------------------------------------------------|-------------------------|-----------------------------------|----------------------------------|
| <b>Completion status</b>                                        |                         |                                   |                                  |
| Completed <sup>a</sup>                                          | 50 (74)                 | 62 (90)                           | 56 (81)                          |
| Withdrawn                                                       | 18 (26)                 | 7 (10)                            | 13 (19)                          |
| <b>Primary reason/sub-reason for<br/>withdrawal<sup>b</sup></b> |                         |                                   |                                  |
| Adverse event                                                   | 0                       | 1 (1)                             | 3 (4)                            |
| Lack of efficacy                                                | 8 (12)                  | 5 (7)                             | 4 (6)                            |
| COPD exacerbation                                               | 6 (9)                   | 5 (7)                             | 2 (3) <sup>c</sup>               |
| Protocol deviation                                              | 0                       | 0                                 | 0                                |
| Patient reached protocol-defined<br>stopping criteria           | 6 (9)                   | 0                                 | 5 (7)                            |
| ECG abnormality                                                 | 6 (9)                   | 0                                 | 5 (7)                            |
| Lab abnormality                                                 | 0                       | 0                                 | 0                                |
| Study closed/terminated                                         | 0                       | 0                                 | 0                                |
| Lost to follow-up                                               | 0                       | 0                                 | 1 (1)                            |
| Withdrew consent                                                | 4 (6)                   | 1 (1)                             | 0                                |
| Burden of procedures                                            | 3 (4)                   | 0                                 | 0                                |
| Frequency of visits                                             | 0                       | 1 (1)                             | 0                                |
| Other                                                           | 1 (1)                   | 0                                 | 0                                |

ECG: electrocardiogram; ITT: intent-to-treat; UMEC: umeclidinium bromide.

<sup>a</sup>Patients were considered to have completed if they completed the last clinic visit (Visit 8).

<sup>b</sup>Patients were not required to indicate sub-reasons.

<sup>c</sup>Although the primary reason for withdrawal was reported as a COPD exacerbation (lack of efficacy) for two UMEC 125 mcg patients, an additional patient in the UMEC 125 mcg treatment group was withdrawn because of a COPD exacerbation which was reported as a serious adverse event. The primary reason for the third patient is, therefore, reported here as an adverse event.

**TABLE 2.** Trough FEV<sub>1</sub> (mL) at day 85 (ITT population)

| <b>Day 85</b>                 | <b>Placebo<br/>n=68</b> | <b>UMEC<br/>62.5 mcg<br/>n=69</b> | <b>UMEC<br/>125 mcg<br/>n=69</b> |
|-------------------------------|-------------------------|-----------------------------------|----------------------------------|
| n <sup>a</sup>                | 67                      | 69                                | 66                               |
| n <sup>b</sup>                | 50                      | 61                                | 55                               |
| LSM (SE)                      | 1235 (28.0)             | 1363 (25.7)                       | 1388 (26.8)                      |
| LSM change (SE)               | -7 (28.0)               | 120 (25.7)                        | 145 (26.8)                       |
| Column vs. placebo difference |                         | 127                               | 152                              |
| 95% CI                        |                         | (52–202)                          | (76–229)                         |
| p-value                       |                         | <0.001                            | <0.001                           |

CI: confidence interval; FEV<sub>1</sub>: forced expiratory volume in 1 second; ITT: intent-to-treat; LSM: least squares mean; SE: standard error; UMEC: umeclidinium bromide.

Note: analysis performed using a repeated measures model with covariates of treatment, baseline (mean of the two assessments made 30 and 5 min pre-dose on day 1), smoking status, centre group, day, day by baseline and day by treatment interactions.

<sup>a</sup>Number of patients with analysable data for one or more visits.

<sup>b</sup>Number of patients with analysable data at the current visit.

**TABLE 3.** Trough FVC (mL) at day 85 (ITT population)

| <b>Day 85</b>                 | <b>Placebo<br/>n=68</b> | <b>UMEC<br/>62.5 mcg<br/>n=69</b> | <b>UMEC<br/>125 mcg<br/>n=69</b> |
|-------------------------------|-------------------------|-----------------------------------|----------------------------------|
| n <sup>a</sup>                | 67                      | 69                                | 66                               |
| n <sup>b</sup>                | 50                      | 61                                | 55                               |
| LSM (SE)                      | 2699 (44.6)             | 2892 (41.1)                       | 2935 (42.8)                      |
| LSM change (SE)               | 47 (44.6)               | 241 (41.1)                        | 283 (42.8)                       |
| Column vs. placebo difference |                         | 193                               | 236                              |
| 95% CI                        |                         | (74–313)                          | (114–358)                        |
| p-value                       |                         | 0.002                             | <0.001                           |

CI: confidence interval; FVC: forced vital capacity; ITT: intent-to-treat; LSM: least squares mean; SE: standard error; UMEC: umeclidinium bromide.

Note: analysis performed using a repeated measures model with covariates of treatment, baseline (mean of the two assessments made 30 and 5 min pre-dose on day 1), smoking status, centre group, day, day by baseline and day by treatment interactions.

<sup>a</sup>Number of patients with analysable data for one or more visits.

<sup>b</sup>Number of patients with analysable data at the current visit.

**TABLE 4.** 0–6 h weighted mean FVC (mL) at day 84 (ITT population)

| <b>Time point</b>             | <b>Placebo<br/>n=68</b> | <b>UMEC<br/>62.5 mcg<br/>n=69</b> | <b>UMEC<br/>125 mcg<br/>n=69</b> |
|-------------------------------|-------------------------|-----------------------------------|----------------------------------|
| <b>Day 84</b>                 |                         |                                   |                                  |
| n <sup>a</sup>                | 66                      | 69                                | 69                               |
| n <sup>b</sup>                | 49                      | 60                                | 56                               |
| LSM (SE)                      | 2691 (44.8)             | 2934 (41.0)                       | 3009 (42.3)                      |
| LSM change (SE)               | 42 (44.8)               | 285 (41.0)                        | 360 (42.3)                       |
| Column vs. placebo difference |                         | 243                               | 318                              |
| 95% CI                        |                         | (123–363)                         | (196–439)                        |
| p-value                       |                         | <0.001                            | <0.001                           |

CI: confidence interval; FVC: forced vital capacity; ITT: intent-to-treat; LSM: least squares mean; SE: standard error; UMEC: umeclidinium bromide.

Note: analysis performed using a repeated measures model with covariates of treatment, baseline (mean of the two assessments made 30 and 5 min pre-dose on day 1), smoking status, centre group, day, day by baseline and day by treatment interactions.

<sup>a</sup>Number of patients with analysable data for one or more visits.

<sup>b</sup>Number of patients with analysable data at the current visit.

**TABLE 5.** Analysis of proportion of responders according to TDI focal score (ITT population)

| <b>Time point</b>             | <b>Placebo<br/>n=68</b> | <b>UMEC<br/>62.5 mcg<br/>n=69</b> | <b>UMEC<br/>125 mcg<br/>n=69</b> |
|-------------------------------|-------------------------|-----------------------------------|----------------------------------|
| <b>Day 84</b>                 |                         |                                   |                                  |
| n                             | 53                      | 64                                | 60                               |
| Responder, n (%) <sup>a</sup> | 8 (15)                  | 24 (38)                           | 23 (38)                          |
| Non-responders, n (%)         | 45 (85)                 | 40 (63)                           | 37 (62)                          |
| Column vs. placebo            |                         |                                   |                                  |
| Odds ratio                    |                         | 3.4                               | 3.4                              |
| 95% CI                        |                         | (1.3–8.4)                         | (1.4–8.6)                        |
| p-value                       |                         | 0.009                             | 0.009                            |

BDI: Baseline Dyspnoea Index; CI: confidence interval; ITT: intent-to-treat; TDI: Transitional Dyspnoea Index; UMEC: umeclidinium bromide.

Note: analysis performed using a separate logistic regression model at each visit with covariates of treatment, BDI focal score, smoking status and centre group.

<sup>a</sup>Response was defined as a TDI focal score of at least 1 unit. Non-response was defined as a TDI focal score of less than 1 unit or a missing TDI focal score with no subsequent non-missing TDI assessments. The classification was not derived if the TDI focal score was missing but subsequent non-missing TDI assessments were present.
